# Supplementary material for: Polyaniline-wrapped MnMoO4as an active catalyst for hydrogen production by electrochemical water splitting
Source: Royal Society of Chemistry journal article supplement (doi:10.1039/d2dt00032f), 2022-01-01
Supplement: d2dt00032f1.pdf [file d2dt00032f1.pdf]

## **Supporting information (SI)**

### **Polyaniline-wrapped MnMoO<sub>4</sub> as an active catalyst for hydrogen production by electrochemical water splitting**

Mohaseen S. Tamboli,<sup>a,1</sup> Supriya A. Patil,<sup>b,1</sup> Asiya M. Tamboli,<sup>a,1</sup> Santosh S. Patil,<sup>c</sup> Nguyen Tam Nguyen Truong,<sup>d</sup> Kiyoungh Lee,<sup>c</sup> C. S. Praveen,<sup>c</sup> Nabeen K. Shrestha,<sup>f</sup> Chinho Park<sup>a\*</sup> and Bharat B. Kale<sup>g\*</sup>

<sup>a</sup>Korea Institute of Energy Technology (KENTECH), 200 Hyeokshin-ro, Naju, Jeollanam-do 58330, Republic of Korea, Email- [chpark@kentech.ac.kr](mailto:chpark@kentech.ac.kr), Tel: +82-61-330-9602

<sup>b</sup>Department of Nanotechnology and Advanced Materials Engineering, Sejong University, Seoul 05006, Republic of Korea

<sup>c</sup>Department of Chemistry and Chemical Engineering, Inha University, 100 Inha-ro, Michuhol-gu, 22212, Incheon, South Korea

<sup>d</sup>School of Chemical Engineering, Yeungnam University, 280 Daehak-ro, Gyeongsan, 38541, Republic of Korea

<sup>e</sup>International School of Photonics, Cochin University of Science and Technology, University Road, South Kalamassery, Kalamassery, Ernakulam, Kerala, 682022, India

<sup>f</sup>Division of Physics and Semiconductor Science, Dongguk University, Seoul, South Korea

<sup>g</sup>Centre for Materials for Electronics Technology (C-MET), Ministry of Electronics and Information Technology (MeitY), Government of India, Panchawati Off Pashan Road, Pune – 411008, India, E-mail: [bbkale@cmet.gov.in](mailto:bbkale@cmet.gov.in); Tel: +91 20 2589 8390

<sup>1</sup>These authors are equally contributed

## Supporting Information SI-I

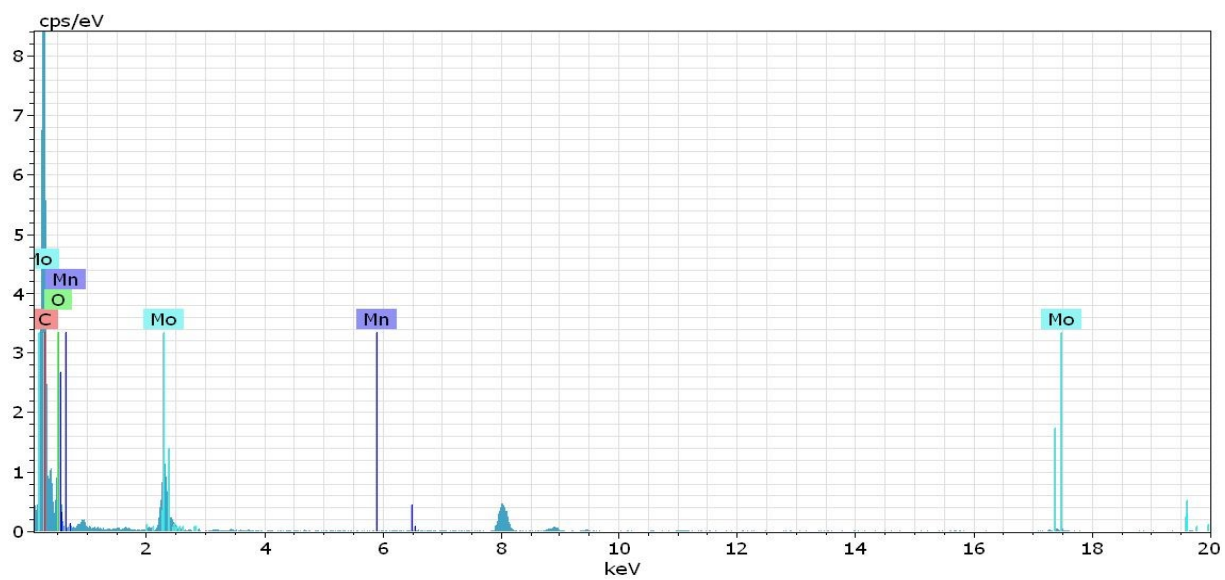

**Fig. S1.** EDAX of MnMoO<sub>4</sub>/PANI (PM-10)

Supporting Information SI-II

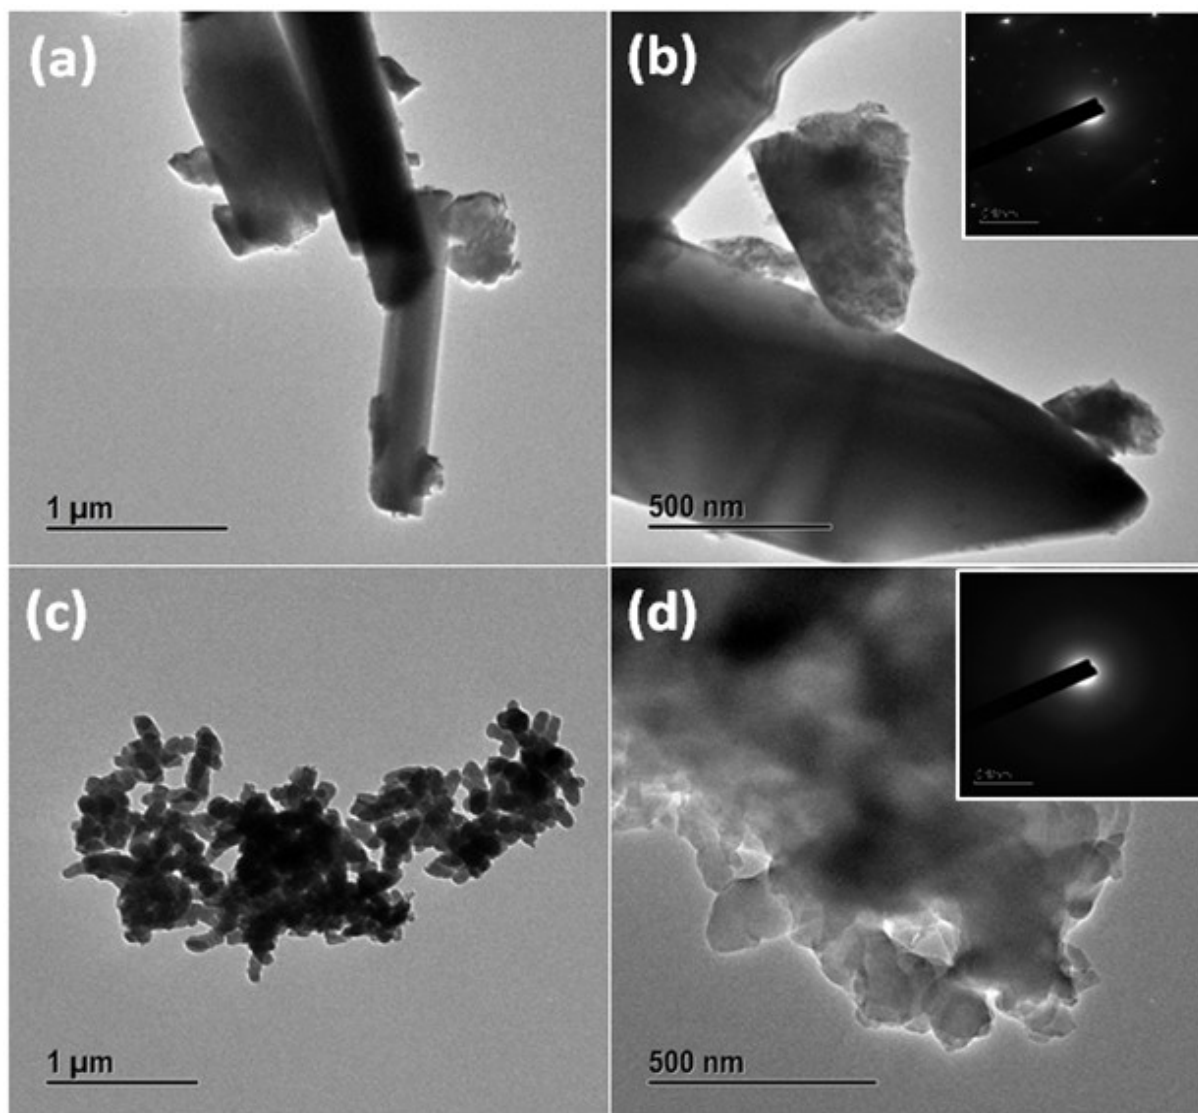

**Fig. S2.** TEM of pure  $\text{MnMoO}_4$  (a,b) with SAED pattern (inset of Fig. b) and PANI (c,d) with SAED pattern (inset of Fig. d)

### Supporting Information SI-III

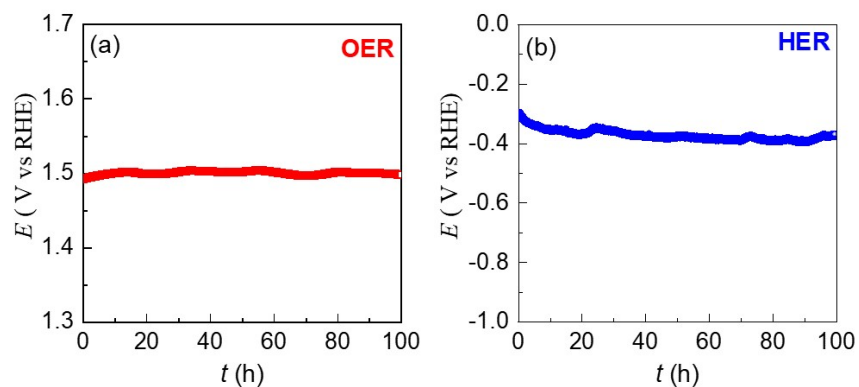

**Fig. S3.** Long term durability test: (a), (b) chronopotentiometry curves of PM-10 for OER and HER test at a constant current density of  $30 \text{ mAcm}^{-2}$  and  $-10 \text{ mAcm}^{-2}$ , respectively.

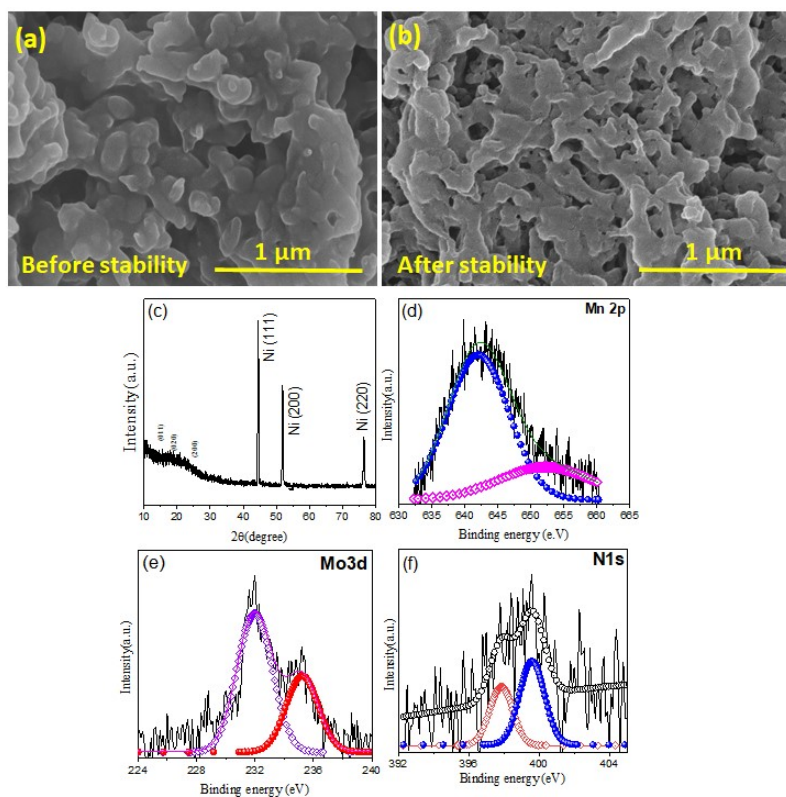

**Fig. S4.** SEM image's view of the PM-10 electrode (a) before and (b) after stability testing for 100 h in a 1M KOH solution. (c) XRD patterns, (d), (e) and (f) XPS spectra after stability.

## Supporting Information SI-IV

Table S1 Comparison of OER, HER and overall water splitting (OWS) performances with reported

| Catalyst                                                                               | OER           | HER<br>$\eta_{10}$<br>(mV) | OWS Cell potential<br>@10 mA/cm <sup>2</sup> (V) | References       |
|----------------------------------------------------------------------------------------|---------------|----------------------------|--------------------------------------------------|------------------|
| <b>MnMoO<sub>4</sub>/PANI</b>                                                          | <b>410@30</b> | <b>155</b>                 | <b>1.65 V vs RHE</b>                             | <b>This work</b> |
| Cu-Co <sub>3</sub> (PO <sub>4</sub> ) <sub>2</sub>                                     | 411@10        |                            | 1.72                                             | 1                |
| Co-Fe oxide                                                                            | 258@10        | 284                        | 1.71                                             | 2                |
| Fe (Ni/Co)                                                                             | 220@10        | 145                        | 1.65                                             | 3                |
| Mn <sub>1.5</sub> Co <sub>1.5</sub> (PO <sub>4</sub> ) <sub>2</sub> ·3H <sub>2</sub> O | 254@10        | 121                        | 1.54                                             | 4                |
| MoS <sub>2</sub> -NiS <sub>2</sub> /NGF                                                | 370@10        | 172                        | 1.64                                             | 5                |
| Ni-Fe-P                                                                                | 271@10        | 182                        | 1.68                                             | 6                |
| FeP/Co <sub>3</sub> (PO <sub>4</sub> ) <sub>2</sub>                                    | 237@10        | 85                         | 1.61                                             | 7                |
| RuTe <sub>2</sub>                                                                      | 275@10        | 34                         | 1.57                                             | 8                |
| 1D-CoS                                                                                 | 280@10        | 159                        | 1.75                                             | 9                |
| NC-PB@CNT                                                                              | 270@50        | 152                        | 1.66 @50                                         | 10               |
| Co (OH) <sub>2</sub> @NCNTs                                                            | 270@10        | 170                        | 1.72                                             | 11               |

catalysts.

1. Electronic modulation of cobalt phosphide nanosheet arrays via copper doping for highly efficient neutral-pH overall water splitting
2. Initiating an efficient electrocatalyst for water splitting via valence configuration of cobalt-iron oxide
3. Facile electrosynthesis of Fe (Ni/Co) hydroxyphosphate as a bifunctional electrocatalyst for efficient water splitting
4. Mn-Co bimetallic phosphate on electrodeposited PANI nanowires with composition modulated structural morphology for efficient electrocatalytic water splitting
5. 0D/3D MoS<sub>2</sub>-NiS<sub>2</sub>/N-doped graphene foam composite for efficient overall water splitting
6. Porous structured Ni-Fe-P nanocubes derived from a prussian blue analogue as an electrocatalyst for efficient overall water splitting

7 Porous Mn-Doped FeP/Co<sub>3</sub>(PO<sub>4</sub>)<sub>2</sub> nanosheets as efficient electrocatalysts for overall water splitting in a wide pH range

8. Crystallized RuTe<sub>2</sub> as unexpected bifunctional catalyst for overall water splitting

9. Bimetallic Ni-Co@hexacyano nano-frameworks anchored on carbon nanotubes for highly efficient overall water splitting and urea decontamination

10. Bimetallic Ni-Co@hexacyano nano-frameworks anchored on carbon nanotubes for highly efficient overall water splitting and urea decontamination

11. P. Guo, J. Wu, X.B. Li, J. Luo, W.M. Lau, H. Liu, X.L. Sun, L.M. Liu, A highly stable bifunctional catalyst based on 3D Co(OH)<sub>2</sub>@NCNTs@NF towards overall water-splitting, Nano Energy. 47 (2018) 96–104.
